# Supplementary material for: Insulin secretion from beta cells in intact mouse islets is targeted towards the vasculature
Source: PubMed Central journal article supplement (PMC4079948; doi:10.1007/s00125-014-3252-6), 2014-05-05
Supplement: 125_2014_3252_MOESM4_ESM.pdf [file 125_2014_3252_MOESM4_ESM.pdf]

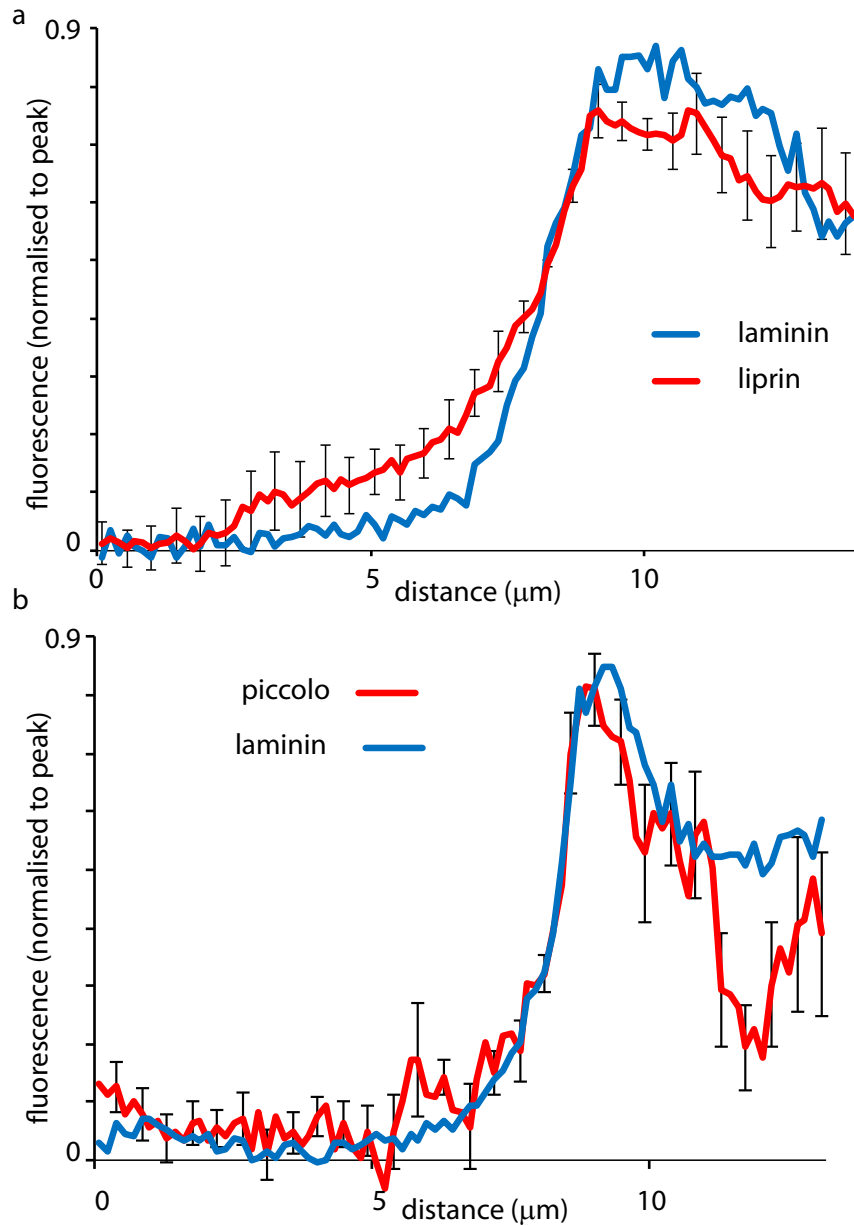

ESM Fig. 3 Linescan analysis of (a) liprin with laminin and (b) piccolo with laminin. The average fluorescence along a line drawn around the perimeter of beta cells (n=10 cells) were aligned for the mid-point of the enhanced laminin fluorescence observed at the vascular face. The mean  $\pm$  SEM for liprin and piccolo fluorescence are shown and demonstrate they are both enriched at this vascular face.
